# Supplementary material for: Child Mortality Estimation: Estimating Sex Differences in Childhood Mortality since the 1970s
Source: PLoS Med. 2012 Aug 28;9(8):e1001287. doi: 10.1371/journal.pmed.1001287 (PMC3429399; doi:10.1371/journal.pmed.1001287)
Supplement: Table S2 — Sex ratios and levels of infant, child, and under-five mortality for countries, 1970s–2000s. (XLS) [file pmed.1001287.s002.xls]

## Sheet: Table S2-Methods and results
Table S2. Sex ratios and levels of infant, child and under-five mortality for countries, 1970s-2000s
Explanatory notes are located in the sheet 'Notes to Table S2'
ISO Code	Country or area	Trend estimates of sex ratios	Decade	Sex ratio of mortality			Infant mortality rate (deaths under 1 y per 1,000 live births)			Child mortality rate (deaths at age 1-4 y per 1,000)			Under-five mortality rate (deaths under 5 y per 1,000 live births)			Method used to derive sex ratio estimates
				Infant	Child	Under-five	Male	Female	Both sexes	Male	Female	Both sexes	Male	Female	Both sexes
4	Afghanistan	N	1970s	107	100	104	209.7	195.8	203	125.7	125.9	125.8	309	297	303.2	Average
4	Afghanistan	N	1980s	107	100	104	183.3	171.1	177.4	107.4	107.8	107.6	270.9	260.4	265.8	Average
4	Afghanistan	N	1990s	107	99	104	162.3	151.5	157.1	92.8	93.3	93	240	230.7	235.5	Average
4	Afghanistan	N	2000s	107	99	104	144.5	134.9	139.8	79.6	80.3	80	212.6	204.4	208.6	Average
8	Albania	Y	1980s	110	89	107	43	39.1	41.1	6.8	7.6	7.2	49.5	46.4	48	Linear
8	Albania	Y	1990s	110	109	110	32.2	29.1	30.7	4.7	4.3	4.5	36.7	33.4	35.1	Linear
8	Albania	Y	2000s	111	140	114	21.3	19.2	20.3	3	2.1	2.6	24.2	21.3	22.8	Linear
12	Algeria	Y	1970s	107	91	102	122.6	114.2	118.5	56.1	61.7	58.9	171.7	168.8	170.3	Linear
12	Algeria	Y	1980s	108	104	107	62.6	57.8	60.2	30.8	30	30.4	91.4	86	88.7	Linear
12	Algeria	Y	1990s	109	117	111	41.1	37.6	39.4	15.6	13.3	14.5	56	50.4	53.3	Linear
12	Algeria	Y	2000s	111	137	116	28.6	25.9	27.3	9.5	6.9	8.2	37.8	32.6	35.3	Linear
24	Angola	N	1970s			110			166.8			136.5	293.1	267.7	280.6	Average
24	Angola	N	1980s			110			155			124.6	271.9	248.3	260.2	Average
24	Angola	N	1990s			110			144.2			114.6	253.1	231.1	242.3	Average
24	Angola	N	2000s			110			110.1			80.3	189.7	173.3	181.6	Average
32	Argentina	Y	1970s	121	108	118	47.6	39.5	43.6	9.5	8.8	9.2	56.6	47.9	52.4	Loess
32	Argentina	Y	1980s	124	113	123	32.8	26.4	29.7	5.6	5	5.3	38.3	31.2	34.8	Loess
32	Argentina	Y	1990s	125	115	124	25.6	20.5	23.1	3.5	3	3.3	29	23.4	26.3	Loess
32	Argentina	Y	2000s	124	115	123	15.7	12.7	14.2	2.4	2.1	2.3	18.1	14.7	16.5	Loess
51	Armenia	Y	1980s	115	84	110	53.7	46.8	50.5	7.5	9	8.2	60.8	55.4	58.3	Loess
51	Armenia	Y	1990s	126	94	121	45.1	35.8	40.8	7.3	7.9	7.6	52.1	43.3	48.1	Loess
51	Armenia	Y	2000s	131	99	127	31.4	24	28	3.3	3.3	3.3	34.6	27.3	31.2	Loess
36	Australia	Y	1970s	128	125	128	16	12.5	14.3	3.3	2.6	2.9	19.2	15.1	17.2	Loess
36	Australia	Y	1980s	128	127	128	10.4	8.1	9.3	2.1	1.7	1.9	12.5	9.8	11.2	Loess
36	Australia	Y	1990s	127	123	126	6.4	5	5.7	1.6	1.3	1.4	7.9	6.3	7.1	Loess
36	Australia	Y	2000s	127	117	125	5.2	4.1	4.7	1	0.8	0.9	6.2	5	5.6	Loess
40	Austria	Y	1970s	131	124	130	22.3	17	19.7	3.5	2.8	3.2	25.7	19.8	22.8	Loess
40	Austria	Y	1980s	128	122	127	11.9	9.3	10.6	2.1	1.7	1.9	14	11	12.5	Loess
40	Austria	Y	1990s	123	114	121	6.2	5	5.6	1.4	1.2	1.3	7.5	6.2	6.9	Loess
40	Austria	Y	2000s	119	102	115	4.3	3.7	4	0.9	0.9	0.9	5.2	4.5	4.9	Loess
31	Azerbaijan	Y	1980s	119	101	115	94.6	79.2	87.5	22	21.8	21.9	114.5	99.3	107.5	Linear
31	Azerbaijan	Y	1990s	116	108	114	76.3	65.9	71.5	22.1	20.4	21.4	96.8	85	91.3	Linear
31	Azerbaijan	Y	2000s	112	115	112	48.9	43.7	46.5	8.8	7.7	8.3	57.3	51	54.4	Linear
50	Bangladesh	Y	1970s	119	81	103	170.3	143	157	88.3	109.3	98.7	243.3	236.4	239.9	Loess
50	Bangladesh	Y	1980s	117	78	101	122.2	104.3	113.5	56.6	73.2	64.8	171.9	169.8	170.9	Loess
50	Bangladesh	Y	1990s	113	82	102	87	77.2	82.2	34.5	42.3	38.3	118.4	116.2	117.3	Loess
50	Bangladesh	Y	2000s	110	93	106	56.7	51.4	54.1	16.5	18	17.2	72.2	68.5	70.4	Loess
112	Belarus	Y	1980s	136	127	134	17.9	13.1	15.6	4.3	3.4	3.9	22.1	16.5	19.4	Loess
112	Belarus	Y	1990s	136	132	135	15.5	11.4	13.5	3.8	2.9	3.3	19.2	14.2	16.8	Loess
112	Belarus	Y	2000s	135	138	136	7.9	5.9	6.9	2.8	2	2.4	10.7	7.9	9.3	Loess
56	Belgium	Y	1970s	131	123	130	17.8	13.5	15.7	3.2	2.6	2.9	21	16.1	18.6	Loess
56	Belgium	Y	1980s	132	122	130	11.1	8.4	9.8	2.2	1.8	2	13.3	10.2	11.8	Loess
56	Belgium	Y	1990s	129	121	128	7.2	5.6	6.4	1.3	1.1	1.2	8.5	6.7	7.6	Loess
56	Belgium	Y	2000s	125	124	125	4.4	3.5	4	1.1	0.9	1	5.5	4.4	5	Loess
204	Benin	Y	1970s	113	103	108	153.1	134.9	144.2	116.2	112.6	114.4	251.4	232.3	242.1	Linear
204	Benin	Y	1980s	113	100	107	130.1	115.6	123	93.2	93.5	93.4	211.2	198.2	204.9	Linear
204	Benin	Y	1990s	112	96	105	108.6	97.1	103	71.3	74.2	72.7	172.1	164.1	168.2	Linear
204	Benin	Y	2000s	111	92	103	92.4	83.2	87.9	55.6	60.2	57.9	142.8	138.3	140.6	Linear
68	Bolivia	Y	1970s	126	98	113	156.9	124.9	141.3	98.5	100	99.2	239.8	212.3	226.4	Linear
68	Bolivia	Y	1980s	122	96	112	109.2	89.7	99.7	51.6	53.5	52.5	155	138.3	146.9	Linear
68	Bolivia	Y	1990s	118	94	111	76.5	65	70.9	23.7	25.1	24.4	98.3	88.4	93.5	Linear
68	Bolivia	Y	2000s	114	101	110	53.8	47.3	50.6	16.7	16.6	16.7	69.6	63.1	66.4	Linear
70	Bosnia and Herzegovina	N	1980s	125	154	128	26.1	20.8	23.5	3.3	2.2	2.8	29.3	22.9	26.2	Average
70	Bosnia and Herzegovina	N	1990s	125	146	128	12.7	10.2	11.5	2.1	1.5	1.8	14.9	11.6	13.3	Average
70	Bosnia and Herzegovina	N	2000s	125	147	128	8.4	6.7	7.6	1.3	0.9	1.1	9.7	7.6	8.7	Average
72	Botswana	N	1970s	134	113	127	94.3	70.3	82.5	39.3	34.7	37	129.8	102.5	116.4	Average
72	Botswana	N	1980s	134	109	127	67.2	50.1	58.8	22.3	20.3	21.3	87.9	69.4	78.8	Average
72	Botswana	N	1990s	134	110	127	64.4	48	56.3	22.9	20.7	21.8	85.7	67.7	76.9	Average
72	Botswana	N	2000s	134	114	127	56.8	42.4	49.7	26.7	23.4	25.1	82	64.8	73.5	Average
76	Brazil	Y	1970s	125	114	121	93.8	75	84.6	37.3	32.6	35	127.5	105.2	116.6	Linear
76	Brazil	Y	1980s	125	112	122	64	51.3	57.8	16.8	14.9	15.9	79.7	65.5	72.8	Linear
76	Brazil	Y	1990s	124	116	122	42.4	34.1	38.3	12.1	10.4	11.3	53.9	44.2	49.2	Linear
76	Brazil	Y	2000s	124	118	123	28	22.6	25.4	7	5.9	6.5	34.8	28.4	31.7	Linear
100	Bulgaria	Y	1970s	128	114	125	32.3	25.3	28.9	5.6	4.9	5.3	37.7	30.1	34	Loess
100	Bulgaria	Y	1980s	129	120	127	21.2	16.4	18.9	5.3	4.4	4.9	26.4	20.8	23.7	Loess
100	Bulgaria	Y	1990s	128	116	125	20.6	16.1	18.4	4.9	4.2	4.6	25.4	20.3	22.9	Loess
100	Bulgaria	Y	2000s	125	107	122	14.7	11.8	13.3	2.8	2.6	2.7	17.5	14.4	16	Loess
854	Burkina Faso	Y	1970s	117	109	113	157.8	134.3	146.3	129.5	118.6	124.1	266.7	236.9	252.2	Linear
854	Burkina Faso	Y	1980s	115	103	109	123.7	107.2	115.7	107.6	104.2	105.9	218	200.2	209.3	Linear
854	Burkina Faso	Y	1990s	113	99	105	103.3	91.1	97.3	109.2	110.1	109.7	201.2	191.2	196.3	Linear
854	Burkina Faso	Y	2000s	111	94	102	86.7	77.9	82.4	95.9	101.7	98.8	174.3	171.6	173	Linear
108	Burundi	N	1970s	112	96	104	139.2	124.6	132	98.7	102.7	100.7	224.1	214.5	219.4	Average
108	Burundi	N	1980s	112	96	104	123.7	110.8	117.4	85.6	89.3	87.4	198.7	190.2	194.5	Average
108	Burundi	N	1990s	112	96	104	128.1	114.7	121.5	90	93.8	91.9	206.6	197.7	202.2	Average
108	Burundi	N	2000s	112	95	104	109.8	98.3	104.1	71.7	75.3	73.5	173.6	166.2	169.9	Average
116	Cambodia	Y	1970s	118	91	108	240.4	202.7	222	113.8	123.8	118.8	325.6	300.5	313.4	Linear
116	Cambodia	Y	1980s	121	99	113	126.8	104.5	115.9	61.4	62.3	61.9	180.2	160.1	170.4	Linear
116	Cambodia	Y	1990s	125	104	117	95.9	77	86.7	39.2	37.9	38.5	131.3	111.9	121.8	Linear
116	Cambodia	Y	2000s	128	110	122	75.7	59.3	67.7	28	25.6	26.8	101.5	83.3	92.6	Linear
120	Cameroon	Y	1970s	120	99	110	124	103.2	113.7	84.5	85	84.7	197.9	179.4	188.8	Linear
120	Cameroon	Y	1980s	122	97	111	104.8	85.9	95.5	64.4	66.3	65.4	162.4	146.6	154.6	Linear
120	Cameroon	Y	1990s	124	96	111	104.7	84.6	94.8	62.6	65.3	63.9	160.7	144.4	152.7	Linear
120	Cameroon	Y	2000s	125	95	112	106	84.4	95.4	63.9	67.1	65.5	163.1	145.9	154.6	Linear
124	Canada	Y	1970s	126	125	126	15.6	12.3	14	3.3	2.6	2.9	18.8	14.9	16.9	Loess
124	Canada	Y	1980s	124	126	125	8.8	7.1	8	2	1.6	1.8	10.8	8.7	9.8	Loess
124	Canada	Y	1990s	122	126	122	6.4	5.2	5.8	1.3	1.1	1.2	7.7	6.3	7	Loess
124	Canada	Y	2000s	119	125	120	5.6	4.7	5.2	1	0.8	0.9	6.6	5.5	6.1	Loess
140	Central African Republic	Y	1970s	111	96	104	135.1	122.1	128.7	97.9	101.6	99.7	219.6	211.3	215.5	Linear
140	Central African Republic	Y	1980s	113	100	107	115.8	102.9	109.5	79.2	79.5	79.4	185.8	174.3	180.1	Linear
140	Central African Republic	Y	1990s	115	103	109	122.1	106.5	114.4	85	82.2	83.6	196.7	180	188.5	Linear
140	Central African Republic	Y	2000s	117	107	112	117.8	101	109.5	82.4	77.1	79.7	190.5	170.3	180.5	Linear
148	Chad	Y	1970s	117	106	111	161.2	137.6	149.6	125.5	117.8	121.6	266.4	239.2	253	Linear
148	Chad	Y	1980s	118	103	111	143	121.4	132.3	96.7	93.6	95.2	225.8	203.6	214.9	Linear
148	Chad	Y	1990s	118	101	110	140.7	118.8	130	89.4	88.7	89.1	217.6	197	207.5	Linear
148	Chad	Y	2000s	119	99	110	143.6	120.6	132.3	90	91.1	90.6	220.7	200.7	210.9	Linear
152	Chile	Y	1970s	119	112	118	61.8	51.8	56.9	11.4	10.3	10.9	72.5	61.5	67.1	Loess
152	Chile	Y	1980s	121	120	121	23	19	21	3.9	3.3	3.6	26.8	22.2	24.5	Loess
152	Chile	Y	1990s	121	128	122	14	11.6	12.8	2.6	2.1	2.3	16.6	13.6	15.1	Loess
152	Chile	Y	2000s	119	134	122	8.3	6.9	7.6	1.9	1.4	1.6	10.1	8.3	9.2	Loess
156	China	Y	1970s	112	95	105	46.9	41.7	44.4	32.4	33.8	33	77.7	74	76	Loess
156	China	Y	1980s	99	89	96	35.5	35.9	35.7	16	17.9	16.9	50.9	53.1	51.9	Loess
156	China	Y	1990s	79	94	82	25.6	32.5	28.8	8.3	8.8	8.5	33.7	41.1	37.1	Loess
156	China	Y	2000s	76	102	80	20.4	26.7	23.3	4.8	4.7	4.8	25.1	31.2	27.9	Loess
344	China, Hong Kong Special Administrative Region	Y	1970s	122	110	119	17.2	14.1	15.7	5	4.5	4.8	22.1	18.6	20.4	Loess
344	China, Hong Kong Special Administrative Region	Y	1980s	116	112	115	9	7.8	8.4	2.9	2.5	2.7	11.8	10.3	11.1	Loess
344	China, Hong Kong Special Administrative Region	Y	1990s	112	114	113	4.7	4.2	4.5	1.6	1.4	1.5	6.4	5.6	6	Loess
344	China, Hong Kong Special Administrative Region	Y	2000s	110	119	112	2.5	2.3	2.4	0.9	0.8	0.9	3.5	3.1	3.3	Loess
170	Colombia	Y	1970s	122	106	117	71.1	58.3	64.9	27.9	26.4	27.2	97	83.2	90.2	Linear
170	Colombia	Y	1980s	125	115	122	43.4	34.7	39.2	15.5	13.5	14.5	58.2	47.7	53.1	Linear
170	Colombia	Y	1990s	129	125	128	29	22.5	25.8	10.5	8.4	9.5	39.2	30.7	35	Linear
170	Colombia	Y	2000s	132	136	133	22.4	17	19.8	8.7	6.4	7.6	30.9	23.3	27.2	Linear
178	Congo	Y	1970s	131	82	109	97.2	74.3	85.9	50.8	62	56.4	143	131.7	137.4	Linear
178	Congo	Y	1980s	124	93	110	83.7	67.7	75.8	44.7	48.5	46.6	124.7	112.9	118.9	Linear
178	Congo	Y	1990s	116	107	112	79.7	68.8	74.3	47.9	44.6	46.3	123.8	110.3	117.2	Linear
178	Congo	Y	2000s	108	126	114	76.7	70.9	73.9	50.9	40.5	45.8	123.7	108.5	116.2	Linear
188	Costa Rica	Y	1970s	125	107	121	45.9	36.8	41.5	11	10.4	10.7	56.4	46.7	51.7	Loess
188	Costa Rica	Y	1980s	128	116	126	20.5	16	18.3	3.8	3.3	3.6	24.2	19.3	21.8	Loess
188	Costa Rica	Y	1990s	126	122	126	14.7	11.6	13.2	2.3	1.9	2.1	17	13.5	15.3	Loess
188	Costa Rica	Y	2000s	123	129	123	11.2	9.1	10.2	1.8	1.4	1.6	13	10.5	11.8	Loess
384	Cote dIvoire	Y	1970s	121	113	117	128.8	106.4	117.7	94.3	83.4	88.8	210.8	180.8	196	Linear
384	Cote dIvoire	Y	1980s	123	110	117	104.3	85	94.8	67.5	61.2	64.4	164.8	141	153	Linear
384	Cote dIvoire	Y	1990s	124	109	117	103.3	83	93.3	65.4	60.2	62.8	162	138.3	150.3	Linear
384	Cote dIvoire	Y	2000s	126	106	117	90.2	71.5	80.9	54.3	50.9	52.6	139.5	118.8	129.3	Linear
191	Croatia	Y	1980s	134	134	134	18	13.4	15.8	2.7	2	2.3	20.7	15.4	18.1	Loess
191	Croatia	Y	1990s	128	142	129	9.7	7.6	8.7	1.5	1.1	1.3	11.2	8.7	10	Loess
191	Croatia	Y	2000s	103	166	110	5.9	5.7	5.8	1.2	0.8	1	7.1	6.5	6.8	Loess
192	Cuba	Y	1970s	126	110	124	27.2	21.5	24.4	4.5	4.1	4.3	31.5	25.5	28.6	Loess
192	Cuba	Y	1980s	132	118	129	16.5	12.6	14.6	3.5	3	3.2	20	15.5	17.8	Loess
192	Cuba	Y	1990s	130	125	129	9.1	7	8.1	2.8	2.2	2.5	11.9	9.2	10.6	Loess
192	Cuba	Y	2000s	121	127	123	5.8	4.8	5.3	1.8	1.4	1.6	7.6	6.2	6.9	Loess
203	Czech Republic	Y	1990s	134	126	133	16.5	12.3	14.5	2.6	2.1	2.3	19.1	14.4	16.8	Loess
203	Czech Republic	Y	2000s	132	122	130	9.4	7.1	8.3	2	1.6	1.8	11.4	8.8	10.1	Loess
203	Czech Republic	Y	2000s	129	116	126	4.7	3.7	4.2	1.1	0.9	1	5.8	4.6	5.2	Loess
408	Democratic Peoples Republic of Korea	N	1970s	109	114	110	41.3	37.9	39.7	18.7	16.4	17.6	59.2	53.7	56.5	Average
408	Democratic Peoples Republic of Korea	N	1980s	109	114	110	29.1	26.8	28	11.8	10.4	11.1	40.6	36.9	38.8	Average
408	Democratic Peoples Republic of Korea	N	1990s	109	112	110	41.2	37.9	39.6	32.2	28.7	30.5	72.2	65.5	68.9	Average
408	Democratic Peoples Republic of Korea	N	2000s	109	115	110	29.1	26.7	27.9	8.3	7.2	7.8	37.2	33.8	35.5	Average
180	Democratic Republic of the Congo	Y	1970s	105	99	102	134.8	127.9	131.4	102.7	103.6	103.1	223.7	218.3	221	Linear
180	Democratic Republic of the Congo	Y	1980s	107	104	105	127	118.9	123	96.2	92.9	94.6	210.9	200.8	205.9	Linear
180	Democratic Republic of the Congo	Y	1990s	108	108	108	128.3	118.6	123.5	97.8	90.5	94.2	213.5	198.3	206.1	Linear
180	Democratic Republic of the Congo	Y	2000s	109	113	110	123.1	112.5	117.9	93.8	83.3	88.6	205.3	186.3	196	Linear
208	Denmark	Y	1970s	137	131	136	11.7	8.6	10.2	2.5	1.9	2.2	14.2	10.5	12.4	Loess
208	Denmark	Y	1980s	133	128	132	9	6.8	7.9	1.9	1.5	1.7	10.9	8.2	9.6	Loess
208	Denmark	Y	1990s	128	128	128	5.9	4.6	5.3	1.5	1.1	1.3	7.4	5.8	6.6	Loess
208	Denmark	Y	2000s	123	136	125	4.5	3.7	4.1	0.9	0.7	0.8	5.4	4.3	4.9	Loess
214	Dominican Republic	Y	1970s	120	111	117	99	82.5	91	35.7	32.3	34	131.1	112.1	121.9	Linear
214	Dominican Republic	Y	1980s	118	110	116	74.6	63.4	69.1	13.1	11.9	12.5	86.7	74.6	80.8	Linear
214	Dominican Republic	Y	1990s	115	118	116	47.9	41.5	44.8	7.9	6.7	7.3	55.4	47.9	51.8	Linear
214	Dominican Republic	Y	2000s	113	131	115	34.3	30.3	32.3	4.8	3.7	4.3	38.9	33.8	36.4	Linear
218	Ecuador	Y	1970s	117	90	108	95.6	81.4	88.7	39.8	44.2	41.9	131.6	122	126.9	Linear
218	Ecuador	Y	1980s	119	96	112	67.3	56.5	62	23.3	24.3	23.8	89	79.4	84.3	Linear
218	Ecuador	Y	1990s	121	102	116	42.3	35	38.7	10.9	10.8	10.9	52.7	45.4	49.2	Linear
218	Ecuador	Y	2000s	122	112	121	25.2	20.6	23	5.2	4.6	4.9	30.3	25.1	27.8	Linear
818	Egypt	Y	1970s	102	81	96	130.1	127	128.6	46	56.5	51.1	170	176.3	173.1	Loess
818	Egypt	Y	1980s	105	82	99	95	90.6	92.8	29	35.2	32	121.2	122.5	121.8	Loess
818	Egypt	Y	1990s	108	93	105	59	54.6	56.8	13.2	14.6	13.9	71.4	68.3	69.9	Loess
818	Egypt	Y	2000s	112	128	114	31.1	27.8	29.5	5.3	4.3	4.8	36.3	31.9	34.2	Loess
222	El Salvador	Y	1970s	121	104	115	109.3	90.2	100	52.2	50	51.1	155.8	135.7	146	Linear
222	El Salvador	Y	1980s	122	112	117	71.7	59	65.5	38	34.1	36.1	106.8	91	99.1	Linear
222	El Salvador	Y	1990s	122	113	120	39.6	32.5	36.1	7.7	6.8	7.3	46.9	39.1	43.1	Linear
222	El Salvador	Y	2000s	122	126	123	26.3	21.5	24	4.7	3.7	4.3	30.9	25.2	28.1	Linear
232	Eritrea	N	1970s	123	108	117	143.4	116.2	130	70.8	65.7	68.2	204	174.3	189.4	Average
232	Eritrea	N	1980s	123	108	117	121.5	98.5	110.1	64.2	59.4	61.8	177.8	152	165.1	Average
232	Eritrea	N	1990s	123	105	117	89.9	72.9	81.5	38.5	36.5	37.5	124.9	106.7	115.9	Average
232	Eritrea	N	2000s	123	102	117	63.8	51.7	57.8	21.3	20.9	21.1	83.7	71.5	77.7	Average
233	Estonia	Y	1980s	135	137	136	20.6	15.2	18	6	4.4	5.2	26.5	19.5	23.1	Loess
233	Estonia	Y	1990s	132	119	129	16.7	12.6	14.7	4	3.3	3.7	20.6	15.9	18.3	Loess
233	Estonia	Y	2000s	130	107	124	7.5	5.8	6.7	2	1.8	1.9	9.5	7.6	8.6	Loess
231	Ethiopia	Y	1970s	123	106	114	151.5	122.8	137.3	113	106.6	109.8	247.3	216.3	232	Linear
231	Ethiopia	Y	1980s	124	104	114	147.9	118.8	133.5	106.1	102	104	238.3	208.6	223.7	Linear
231	Ethiopia	Y	1990s	126	101	114	119.8	95.4	107.8	78.5	77.6	78	188.9	165.5	177.4	Linear
231	Ethiopia	Y	2000s	127	97	114	89	70.2	79.8	49.5	51	50.2	134.1	117.6	126	Linear
246	Finland	Y	1970s	127	135	129	11.1	8.7	9.9	2.5	1.9	2.2	13.6	10.6	12.1	Loess
246	Finland	Y	1980s	125	126	125	6.9	5.5	6.2	1.3	1.1	1.2	8.2	6.6	7.4	Loess
246	Finland	Y	1990s	123	128	124	4.7	3.8	4.3	1	0.8	0.9	5.7	4.6	5.2	Loess
246	Finland	Y	2000s	123	132	125	3.3	2.7	3	0.8	0.6	0.7	4.1	3.3	3.7	Loess
250	France	Y	1970s	131	126	130	13.8	10.5	12.2	3	2.4	2.7	16.8	12.9	14.9	Loess
250	France	Y	1980s	131	128	131	9.6	7.3	8.5	2.1	1.7	1.9	11.7	9	10.4	Loess
250	France	Y	1990s	129	127	129	6.1	4.7	5.4	1.3	1.1	1.2	7.4	5.7	6.6	Loess
250	France	Y	2000s	127	125	126	4.2	3.3	3.8	1	0.8	0.9	5.2	4.1	4.7	Loess
266	Gabon	N	1970s	137	107	123	120.4	87.6	104.3	77.5	72	74.7	188.4	153.3	171.1	Average
266	Gabon	N	1980s	137	103	123	81.3	59.2	70.4	42.8	41.4	42.1	120.6	98.1	109.5	Average
266	Gabon	N	1990s	137	101	123	67.6	49.2	58.6	32.1	31.7	31.9	97.6	79.4	88.6	Average
266	Gabon	N	2000s	137	101	123	62.9	45.8	54.4	29.4	29.1	29.3	90.4	73.5	82.1	Average
270	Gambia	N	1970s			114			151.9			118.4	268.6	235.7	252.4	Average
270	Gambia	N	1980s			114			109.4			68.7	181.5	159.3	170.5	Average
270	Gambia	N	1990s			114			89.6			59.9	153.4	134.6	144.2	Average
270	Gambia	N	2000s			114			76.9			38.4	119.5	104.9	112.3	Average
268	Georgia	Y	1980s	133	109	129	51.7	39	45.7	9.1	8.3	8.7	60.3	47	54	Loess
268	Georgia	Y	1990s	127	106	124	39.2	30.8	35.2	5.8	5.4	5.6	44.7	36	40.6	Loess
268	Georgia	Y	2000s	122	104	120	26.5	21.7	24.2	3.2	3.1	3.2	29.6	24.7	27.3	Loess
276	Germany	Y	1970s	131	125	130	19.9	15.2	17.6	3.4	2.7	3.1	23.2	17.8	20.6	Loess
276	Germany	Y	1980s	130	125	129	10.4	8	9.2	2.2	1.8	2	12.6	9.8	11.2	Loess
276	Germany	Y	1990s	127	125	127	5.9	4.6	5.3	1.3	1.1	1.2	7.2	5.7	6.5	Loess
276	Germany	Y	2000s	126	116	124	4.3	3.4	3.9	0.9	0.7	0.8	5.2	4.2	4.7	Loess
288	Ghana	Y	1970s	117	97	108	110.5	94.1	102.5	71.4	73.7	72.6	174	160.9	167.6	Linear
288	Ghana	Y	1980s	118	102	111	94.3	79.7	87.2	57.5	56.3	56.9	146.4	131.5	139.1	Linear
288	Ghana	Y	1990s	119	108	115	77.9	65.3	71.8	45	41.6	43.3	119.3	104.2	111.9	Linear
288	Ghana	Y	2000s	120	115	118	60.6	50.6	55.7	32.5	28.4	30.5	91.2	77.5	84.5	Linear
300	Greece	Y	1970s	120	113	119	29.7	24.8	27.3	3.8	3.4	3.6	33.4	28.1	30.8	Loess
300	Greece	Y	1980s	121	115	120	16.7	13.8	15.3	2.2	1.9	2	18.8	15.7	17.3	Loess
300	Greece	Y	1990s	119	114	118	9.5	8	8.8	1.4	1.2	1.3	10.9	9.2	10.1	Loess
300	Greece	Y	2000s	116	114	116	4.9	4.3	4.6	1	0.8	0.9	5.9	5.1	5.5	Loess
320	Guatemala	Y	1970s	116	93	107	103.8	89.2	96.7	60.7	65	62.8	158.2	148.4	153.4	Linear
320	Guatemala	Y	1980s	118	95	109	78.9	67.2	73.2	36.6	38.4	37.5	112.7	103	107.9	Linear
320	Guatemala	Y	1990s	119	96	112	54.3	45.8	50.2	16.9	17.7	17.3	70.3	62.7	66.6	Linear
320	Guatemala	Y	2000s	120	101	115	37.4	31.2	34.4	9.9	9.9	9.9	46.9	40.8	43.9	Linear
324	Guinea	Y	1970s	112	93	103	192.5	171.5	182.3	145.8	156.4	151	310.2	301	305.7	Linear
324	Guinea	Y	1980s	114	97	106	161.3	141.5	151.7	120	124	122	262	247.9	255.2	Linear
324	Guinea	Y	1990s	116	100	108	133.9	115.6	125	96.2	96.2	96.2	217.2	200.7	209.2	Linear
324	Guinea	Y	2000s	118	103	111	106.4	90.5	98.7	69.4	67.7	68.6	168.4	152	160.5	Linear
624	Guinea-Bissau	N	1970s			119			169.5			140.4	310.2	261.3	286.1	Average
624	Guinea-Bissau	N	1970s			119			149.1			119.6	271.9	229.1	250.8	Average
624	Guinea-Bissau	N	1980s			119			137.3			108.1	250	210.6	230.6	Average
624	Guinea-Bissau	N	1990s			119			122.2			93.3	221.3	186.4	204.1	Average
332	Haiti	Y	1970s	123	95	112	148.6	120.6	135	71.2	74.6	72.9	209.2	186.2	198	Linear
332	Haiti	Y	1980s	122	93	112	126.1	103.5	115	49.9	53.9	51.9	169.7	151.7	160.9	Linear
332	Haiti	Y	1990s	120	92	111	92.3	76.6	84.6	33.1	36.1	34.5	122.3	109.8	116.2	Linear
332	Haiti	Y	2000s	119	90	111	71.9	60.4	66.3	22.3	24.7	23.5	92.6	83.6	88.2	Linear
340	Honduras	Y	1970s	123	106	115	101.7	82.8	92.5	61.9	58.5	60.2	157.3	136.3	147.1	Linear
340	Honduras	Y	1980s	123	103	116	64.9	52.7	59	32.1	31	31.5	94.9	82	88.6	Linear
340	Honduras	Y	1990s	124	100	116	43.3	35.1	39.3	16	15.9	16	58.6	50.5	54.6	Linear
340	Honduras	Y	2000s	124	101	117	33	26.6	29.9	12.2	12.1	12.2	44.8	38.4	41.7	Linear
348	Hungary	Y	1970s	126	119	125	37.5	29.8	33.8	3.5	2.9	3.2	40.9	32.7	36.9	Loess
348	Hungary	Y	1980s	126	128	126	22.8	18.1	20.5	2.7	2.1	2.5	25.4	20.2	22.9	Loess
348	Hungary	Y	1990s	124	132	125	13.3	10.8	12.1	2.3	1.7	2	15.6	12.5	14.1	Loess
348	Hungary	Y	2000s	121	134	123	7.6	6.3	7	1.6	1.2	1.4	9.2	7.5	8.4	Loess
356	India	Y	1970s	96	72	88	110.2	114.4	112.2	50.3	70	59.8	154.9	176.4	165.2	Loess
356	India	Y	1980s	100	69	89	89.8	90.3	90	33.8	49.3	41.2	120.6	135.1	127.6	Loess
356	India	Y	1990s	100	70	90	72.5	72.8	72.7	26.5	37.8	31.9	97	107.8	102.2	Loess
356	India	Y	2000s	97	74	90	56.1	57.6	56.8	19.3	26.3	22.7	74.3	82.4	78.2	Loess
360	Indonesia	Y	1970s	128	100	117	101.9	79.7	91.1	47	47	47	144	122.8	133.7	Linear
360	Indonesia	Y	1980s	124	102	117	71	57	64.2	27.5	26.9	27.2	96.5	82.3	89.6	Linear
360	Indonesia	Y	1990s	121	107	117	49.3	40.7	45.1	16.2	15.1	15.7	64.7	55.2	60.1	Linear
360	Indonesia	Y	2000s	118	116	117	34.2	29	31.6	9.6	8.3	9	43.4	37.1	40.3	Linear
364	Iran (Islamic Republic of)	N	1970s	110	146	119	109.1	99.2	104.3	59.2	40.7	50.1	161.7	135.7	149	Average
364	Iran (Islamic Republic of)	N	1980s	110	171	119	65.5	59.5	62.6	19.6	11.5	15.6	83.8	70.3	77.2	Average
364	Iran (Islamic Republic of)	N	1990s	110	157	119	45	40.9	43	16.5	10.6	13.6	60.8	51	56	Average
364	Iran (Islamic Republic of)	N	2000s	110	152	119	31.2	28.4	29.8	12.4	8.1	10.3	43.2	36.3	39.8	Average
368	Iraq	Y	1970s	111	113	111	71.8	64.8	68.4	29	25.7	27.4	98.7	88.9	93.9	Linear
368	Iraq	Y	1980s	116	118	116	48.5	42	45.3	11.6	9.9	10.8	59.5	51.5	55.6	Linear
368	Iraq	Y	1990s	120	122	120	44.4	36.9	40.7	11.9	9.8	10.9	55.7	46.3	51.2	Linear
368	Iraq	Y	2000s	125	126	125	39.1	31.2	35.3	9.3	7.4	8.4	48	38.4	43.3	Linear
372	Ireland	Y	1970s	125	125	125	18.2	14.6	16.5	3.4	2.7	3.1	21.6	17.3	19.5	Loess
372	Ireland	Y	1980s	124	128	125	9.9	8	9	2.1	1.7	1.9	12	9.7	10.9	Loess
372	Ireland	Y	1990s	124	126	124	6.7	5.4	6.1	1.5	1.2	1.3	8.2	6.6	7.4	Loess
372	Ireland	Y	2000s	124	123	124	4.9	3.9	4.4	1	0.8	0.9	5.8	4.7	5.3	Loess
376	Israel	Y	1970s	118	115	117	23.2	19.7	21.5	4	3.5	3.8	27.1	23.1	25.2	Loess
376	Israel	Y	1980s	114	108	113	12.9	11.3	12.1	2.4	2.2	2.3	15.2	13.5	14.4	Loess
376	Israel	Y	1990s	112	115	113	7.5	6.7	7.1	1.7	1.5	1.6	9.2	8.2	8.7	Loess
376	Israel	Y	2000s	113	127	116	4.7	4.1	4.4	1.3	1.1	1.2	6	5.2	5.6	Loess
380	Italy	Y	1970s	124	115	123	22.9	18.4	20.7	2.7	2.4	2.6	25.5	20.7	23.2	Loess
380	Italy	Y	1980s	123	117	123	11.7	9.5	10.6	1.6	1.4	1.5	13.3	10.8	12.1	Loess
380	Italy	Y	1990s	120	117	119	6.8	5.7	6.3	1.3	1.1	1.2	8.1	6.8	7.5	Loess
380	Italy	Y	2000s	116	116	116	4.1	3.5	3.8	0.6	0.6	0.6	4.7	4.1	4.4	Loess
388	Jamaica	Y	1970s	126	100	121	45.9	36.3	41.2	10.1	10.2	10.2	55.6	46.1	51	Linear
388	Jamaica	Y	1980s	123	107	120	36.8	30	33.5	6.6	6.2	6.4	43.2	36	39.7	Linear
388	Jamaica	Y	1990s	119	123	119	30.7	25.9	28.3	6.5	5.3	5.9	37	31	34.1	Linear
388	Jamaica	Y	2000s	114	146	119	27.3	23.9	25.6	6	4.1	5.1	33.1	27.9	30.5	Linear
392	Japan	Y	1970s	128	129	128	11.1	8.6	9.9	3.7	2.9	3.3	14.8	11.5	13.2	Loess
392	Japan	Y	1980s	121	129	123	6.1	5	5.6	2.3	1.8	2	8.4	6.8	7.6	Loess
392	Japan	Y	1990s	117	126	119	4.4	3.8	4.1	1.7	1.3	1.5	6.1	5.1	5.6	Loess
392	Japan	Y	2000s	114	123	116	3	2.6	2.8	1.1	0.9	1	4.1	3.5	3.8	Loess
400	Jordan	Y	1970s	99	91	97	62	62.8	62.4	21.6	23.6	22.6	82.2	84.8	83.5	Linear
400	Jordan	Y	1980s	110	86	105	42	38.3	40.2	9.2	10.7	9.9	50.8	48.5	49.7	Linear
400	Jordan	Y	1990s	121	79	113	31.2	25.9	28.6	5.1	6.5	5.8	36.2	32.2	34.2	Linear
400	Jordan	Y	2000s	132	75	120	25.3	19.2	22.3	3.7	4.9	4.2	28.8	24	26.5	Linear
398	Kazakhstan	Y	1980s	132	120	130	63.6	48.2	56.1	13.7	11.4	12.6	76.4	59	68	Linear
398	Kazakhstan	Y	1990s	133	123	131	53.7	40.4	47.3	11.6	9.4	10.5	64.6	49.4	57.2	Linear
398	Kazakhstan	Y	2000s	134	127	132	33.6	25.2	29.5	7	5.5	6.3	40.4	30.6	35.6	Linear
404	Kenya	Y	1970s	114	107	111	91.5	80.3	86	58.2	54.3	56.3	144.3	130.3	137.4	Linear
404	Kenya	Y	1980s	116	105	112	73.5	63.2	68.4	41.4	39.4	40.4	111.8	100.1	106	Linear
404	Kenya	Y	1990s	119	104	113	73.5	62	67.8	40.8	39.3	40	111.3	98.8	105.1	Linear
404	Kenya	Y	2000s	121	103	113	73.4	60.7	67.1	42	40.7	41.3	112.3	98.9	105.7	Linear
414	Kuwait	Y	1970s	112	103	110	36.6	32.8	34.7	8.9	8.7	8.8	45.1	41.3	43.2	Loess
414	Kuwait	Y	1980s	117	120	117	20.4	17.6	19	4.3	3.6	4	24.7	21.1	22.9	Loess
414	Kuwait	Y	1990s	118	129	119	13.3	11.3	12.3	2.8	2.2	2.5	16.1	13.5	14.8	Loess
414	Kuwait	Y	2000s	114	119	115	9.5	8.3	8.9	2.5	2.1	2.3	12	10.4	11.2	Loess
417	Kyrgyzstan	Y	1980s	126	89	118	83.2	66.3	75	16	18.1	17	97.8	83.2	90.7	Loess
417	Kyrgyzstan	Y	1990s	133	100	126	61.4	46.4	54.1	11.9	12	12	72.6	57.8	65.4	Loess
417	Kyrgyzstan	Y	2000s	129	110	125	43.1	33.4	38.4	9.5	8.7	9.1	52.2	41.8	47.1	Loess
418	Lao Peoples Democratic Republic	N	1970s	120	102	113	148.5	123.8	136.5	78.1	76.7	77.4	215	191	203.3	Average
418	Lao Peoples Democratic Republic	N	1980s	120	101	113	125.3	104.4	115.1	60.5	60.1	60.3	178.1	158.2	168.4	Average
418	Lao Peoples Democratic Republic	N	1990s	120	98	113	86.5	72.1	79.5	34.8	35.5	35.1	118.3	105	111.8	Average
418	Lao Peoples Democratic Republic	N	2000s	120	93	113	55.8	46.6	51.3	16.5	17.7	17.1	71.4	63.4	67.5	Average
428	Latvia	Y	1980s	133	132	132	17.7	13.4	15.6	6.2	4.7	5.5	23.8	18	21	Loess
428	Latvia	Y	1990s	122	136	125	20.2	16.5	18.4	4.8	3.5	4.2	24.9	20	22.5	Loess
428	Latvia	Y	2000s	109	147	115	10.6	9.8	10.2	2.9	2	2.4	13.5	11.7	12.6	Loess
426	Lesotho	Y	1970s	110	129	115	121.9	110.7	116.4	68.9	53.3	61.2	182.4	158.1	170.4	Linear
426	Lesotho	Y	1980s	119	123	119	96.3	81.2	88.9	45.7	37.2	41.5	137.6	115.3	126.7	Linear
426	Lesotho	Y	1990s	127	117	123	84.3	66.4	75.5	35.2	30	32.6	116.5	94.3	105.6	Linear
426	Lesotho	Y	2000s	135	117	127	93.3	69.3	81.5	46.9	40.2	43.5	135.8	106.7	121.5	Linear
430	Liberia	Y	1970s	122	105	115	179.8	146.9	163.6	99.3	94.8	97	261.2	227.7	244.7	Linear
430	Liberia	Y	1980s	121	104	113	176.3	146.3	161.5	96.9	93.1	95	256.1	225.7	241.1	Linear
430	Liberia	Y	1990s	119	104	112	174.9	147.3	161.3	96.8	93.3	95	254.7	226.8	241	Linear
430	Liberia	Y	2000s	117	101	111	110	94.1	102.2	51.1	50.5	50.8	155.3	139.8	147.7	Linear
434	Libyan Arab Jamahiriya	N	1970s	122	77	116	94.7	77.9	86.5	9	11.8	10.4	102.8	88.7	95.9	Average
434	Libyan Arab Jamahiriya	N	1980s	122	84	116	48.2	39.6	44	6	7.2	6.6	53.9	46.6	50.3	Average
434	Libyan Arab Jamahiriya	N	1990s	122	82	116	26.7	22	24.4	3.1	3.8	3.4	29.7	25.7	27.7	Average
434	Libyan Arab Jamahiriya	N	2000s	122	79	116	17.9	14.7	16.4	1.8	2.3	2.1	19.7	17	18.4	Average
440	Lithuania	Y	1980s	129	131	129	16	12.5	14.3	5.2	3.9	4.6	21.1	16.4	18.8	Loess
440	Lithuania	Y	1990s	124	132	126	14.4	11.6	13	3.6	2.7	3.1	17.9	14.2	16.1	Loess
440	Lithuania	Y	2000s	118	136	122	7.9	6.7	7.3	2.1	1.5	1.8	10	8.2	9.1	Loess
450	Madagascar	Y	1970s	112	106	109	134.4	120	127.2	100.2	94.5	97.3	221	203.1	212.2	Linear
450	Madagascar	Y	1980s	116	106	111	118.3	102.3	110.4	82.3	77.6	79.9	190.8	172	181.5	Linear
450	Madagascar	Y	1990s	119	105	113	93.4	78.4	86	56.8	54	55.4	144.8	128.1	136.5	Linear
450	Madagascar	Y	2000s	123	101	115	56.8	46.2	51.5	25.9	25.5	25.7	81.2	70.5	75.9	Linear
454	Malawi	Y	1970s	108	102	105	170.3	157.2	163.8	146.7	143.3	145	292	278	285.1	Linear
454	Malawi	Y	1980s	111	106	108	154.6	139.5	147.2	119.5	112.8	116.2	255.6	236.6	246.2	Linear
454	Malawi	Y	1990s	113	109	111	134.7	119	126.9	84.2	77.1	80.7	207.5	186.9	197.3	Linear
454	Malawi	Y	2000s	116	113	114	108.5	93.9	101.3	54.5	48.4	51.5	157.1	137.7	147.6	Linear
458	Malaysia	Y	1970s	129	100	121	40.5	31.5	36.2	12.6	12.6	12.6	52.6	43.7	48.3	Loess
458	Malaysia	Y	1980s	127	104	121	25.2	19.8	22.6	7.7	7.4	7.6	32.7	27.1	30	Loess
458	Malaysia	Y	1990s	124	111	120	15.5	12.5	14.1	4.8	4.3	4.6	20.3	16.8	18.6	Loess
458	Malaysia	Y	2000s	121	121	121	9.6	7.9	8.8	3	2.5	2.7	12.5	10.4	11.5	Loess
466	Mali	Y	1970s	118	99	106	164.5	139.6	152.2	201.7	203.8	202.7	332.9	314.9	324	Linear
466	Mali	Y	1980s	116	101	107	148	127.1	137.7	152.6	151.2	151.9	277.9	259	268.6	Linear
466	Mali	Y	1990s	115	104	109	131.5	114.4	123.1	125.5	120.3	122.9	240.5	221	230.9	Linear
466	Mali	Y	2000s	114	109	110	112.5	99.1	105.9	109.6	100.9	105.3	209.8	190	200.1	Linear
478	Mauritania	Y	1970s	112	96	105	129.7	116.3	123.3	69.1	72.2	70.6	189.8	180.1	185.2	Linear
478	Mauritania	Y	1980s	116	101	110	93.3	80.2	87	59.9	59.2	59.6	147.6	134.6	141.4	Linear
478	Mauritania	Y	1990s	121	105	114	83.2	68.7	76.2	53.9	51.4	52.7	132.6	116.5	124.9	Linear
478	Mauritania	Y	2000s	126	107	118	85.4	67.8	76.9	48.2	45	46.6	129.5	109.7	120	Linear
480	Mauritius	Y	1970s	126	96	118	54.7	43.5	49.2	17	17.6	17.3	70.6	60.3	65.5	Loess
480	Mauritius	Y	1980s	129	101	124	27.6	21.3	24.6	4.6	4.6	4.6	32.1	25.8	29	Loess
480	Mauritius	Y	1990s	130	98	126	21.5	16.6	19.1	2.4	2.4	2.4	23.8	19	21.5	Loess
480	Mauritius	Y	2000s	128	105	124	14.6	11.4	13.1	2.8	2.6	2.7	17.3	14	15.7	Loess
484	Mexico	Y	1970s	120	99	113	68.4	57.1	62.9	25.8	26.1	25.9	92.4	81.6	87.2	Loess
484	Mexico	Y	1980s	122	102	118	47.5	38.9	43.3	10.1	9.9	10	57	48.4	52.8	Loess
484	Mexico	Y	1990s	124	110	121	33.5	27.1	30.4	6.5	5.9	6.2	39.8	32.9	36.4	Loess
484	Mexico	Y	2000s	125	117	123	20.6	16.5	18.6	4.2	3.6	3.9	24.7	20	22.4	Loess
498	Moldova	Y	1980s	134	126	132	40	29.9	35.1	9.9	7.9	8.9	49.6	37.5	43.7	Linear
498	Moldova	Y	1990s	128	126	127	29	22.8	26	6	4.8	5.4	34.9	27.5	31.3	Linear
498	Moldova	Y	2000s	121	128	122	20.8	17.1	19	3.8	2.9	3.4	24.4	20	22.3	Linear
496	Mongolia	Y	1980s	127	106	118	108.2	85.3	97	55.1	52.1	53.6	157.3	132.9	145.4	Linear
496	Mongolia	Y	1990s	127	110	122	67.7	53.2	60.6	23.8	21.7	22.8	89.9	73.7	82	Linear
496	Mongolia	Y	2000s	128	120	126	44.5	34.8	39.8	11.3	9.5	10.4	55.3	43.9	49.8	Linear
504	Morocco	Y	1970s	112	73	103	122	108.7	115.5	26.2	35.8	30.9	145	140.6	142.8	Linear
504	Morocco	Y	1980s	115	88	108	93.5	81.2	87.5	25.3	28.8	27	116.3	107.6	112.1	Linear
504	Morocco	Y	1990s	118	93	113	61.9	52.5	57.3	11.1	12	11.5	72.3	63.8	68.2	Linear
504	Morocco	Y	2000s	121	103	119	41.2	34.1	37.7	5.1	5	5.1	46.1	38.9	42.6	Linear
508	Mozambique	Y	1970s	115	100	108	162.9	141	152.1	122.4	122.7	122.6	265.3	246.4	256	Linear
508	Mozambique	Y	1980s	112	101	107	151.1	134.5	143	114.2	112.6	113.4	248.1	231.9	240.1	Linear
508	Mozambique	Y	1990s	109	103	106	129.7	118.7	124.3	96.2	93.1	94.6	213.3	200.7	207	Linear
508	Mozambique	Y	2000s	106	106	106	96.2	90.9	93.6	65.4	61.8	63.6	155.2	147	151.2	Linear
104	Myanmar	N	1970s	133	108	124	119.6	89.9	105.1	54.9	50.6	52.8	167.9	135.9	152.3	Average
104	Myanmar	N	1980s	133	107	124	104	78.1	91.4	44.6	41.6	43.1	143.9	116.5	130.5	Average
104	Myanmar	N	1990s	133	104	124	80.5	60.5	70.7	30	28.7	29.3	108	87.4	98	Average
104	Myanmar	N	2000s	133	101	124	65.3	49.1	57.4	20.9	20.7	20.8	84.9	68.7	77	Average
516	Namibia	Y	1970s	111	109	110	99	89.2	94.2	46.7	42.9	44.8	141	128.3	134.7	Linear
516	Namibia	Y	1980s	117	114	116	77.7	66.2	72	31.2	27.3	29.3	106.5	91.7	99.2	Linear
516	Namibia	Y	1990s	124	120	122	64.1	52	58.1	23.6	19.7	21.7	86.3	70.6	78.6	Linear
516	Namibia	Y	2000s	130	126	128	48.5	37.4	43	19.5	15.5	17.5	67	52.3	59.8	Linear
524	Nepal	Y	1970s	109	84	100	153.8	141.1	147.6	78.6	93.5	85.9	220.3	221.3	220.8	Linear
524	Nepal	Y	1980s	111	83	100	120.5	108.9	114.8	55.1	66.7	60.8	168.9	168.2	168.6	Linear
524	Nepal	Y	1990s	112	79	101	86.6	77.1	81.9	33	41.4	37.1	116.6	115.2	115.9	Linear
524	Nepal	Y	2000s	114	70	102	49.8	43.7	46.8	12.4	17.4	14.9	61.6	60.3	61	Linear
528	Netherlands	Y	1970s	131	129	130	11.7	9	10.4	3.1	2.4	2.7	14.8	11.3	13.1	Loess
528	Netherlands	Y	1980s	130	122	128	8.9	6.9	7.9	2	1.6	1.8	10.9	8.5	9.7	Loess
528	Netherlands	Y	1990s	127	121	126	6.2	4.9	5.6	1.4	1.2	1.3	7.7	6.1	6.9	Loess
528	Netherlands	Y	2000s	123	120	123	4.8	3.9	4.4	1	0.8	0.9	5.8	4.7	5.3	Loess
554	New Zealand	Y	1970s	132	126	131	16.9	12.8	14.9	3.7	3	3.3	20.5	15.7	18.2	Loess
554	New Zealand	Y	1980s	129	130	129	12.8	9.9	11.4	2.6	2	2.3	15.4	11.9	13.7	Loess
554	New Zealand	Y	1990s	127	124	126	7.8	6.1	7	1.9	1.5	1.7	9.7	7.7	8.7	Loess
554	New Zealand	Y	2000s	125	118	124	6	4.8	5.4	1.3	1.1	1.2	7.3	5.9	6.6	Loess
558	Nicaragua	Y	1970s	121	114	117	102.7	85	94.1	60.3	53.1	56.7	156.8	133.6	145.5	Linear
558	Nicaragua	Y	1980s	124	115	121	80	64.4	72.4	35.8	31.1	33.5	112.9	93.4	103.4	Linear
558	Nicaragua	Y	1990s	128	114	124	45.6	35.7	40.8	13.4	11.7	12.5	58.3	47	52.8	Linear
558	Nicaragua	Y	2000s	131	113	128	27.1	20.7	24	5.3	4.7	5.1	32.3	25.3	28.9	Linear
562	Niger	Y	1970s	114	91	101	171.6	150.9	161.5	169.6	185.6	177.5	312.1	308.5	310.3	Linear
562	Niger	Y	1980s	112	95	102	166	147.9	157.1	177	187.3	182.1	313.6	307.5	310.6	Linear
562	Niger	Y	1990s	111	96	103	145.1	131	138.2	141.8	147.2	144.5	266.2	258.8	262.6	Linear
562	Niger	Y	2000s	109	98	104	108.8	99.6	104.3	84.9	87	86	184.4	177.9	181.2	Linear
566	Nigeria	Y	1970s	117	101	109	146.9	125.4	136.3	108.3	107.3	107.8	239.3	219.2	229.4	Linear
566	Nigeria	Y	1980s	117	98	108	136.6	116.6	126.8	97.6	99.1	98.3	220.9	204.1	212.7	Linear
566	Nigeria	Y	1990s	117	96	107	134	114.3	124.3	93.8	97.5	95.6	215.2	200.6	208	Linear
566	Nigeria	Y	2000s	117	93	106	109.6	93.5	101.7	69.4	74.7	72	171.4	161.2	166.4	Linear
578	Norway	Y	1970s	130	144	133	11.6	8.9	10.3	3.1	2.1	2.6	14.7	11	12.9	Loess
578	Norway	Y	1980s	129	139	131	9.2	7.1	8.2	2.2	1.6	1.9	11.4	8.7	10.1	Loess
578	Norway	Y	1990s	127	134	129	5.2	4.1	4.7	1.3	0.9	1.1	6.5	5.1	5.8	Loess
578	Norway	Y	2000s	127	133	128	3.6	2.8	3.2	0.9	0.7	0.8	4.5	3.5	4	Loess
275	Occupied Palestinian Territory	N	1970s	113	128	116	85.1	75	80.2	28.7	22.3	25.6	111.2	95.6	103.6	Average
275	Occupied Palestinian Territory	N	1980s	113	129	116	49.4	43.5	46.5	14.4	11.2	12.9	63.1	54.2	58.8	Average
275	Occupied Palestinian Territory	N	1990s	113	132	116	32.1	28.3	30.3	7.5	5.7	6.6	39.4	33.9	36.7	Average
275	Occupied Palestinian Territory	N	2000s	113	136	116	24.8	21.9	23.4	4.6	3.4	4	29.3	25.2	27.3	Average
586	Pakistan	Y	1970s	111	85	101	116.4	104.7	110.7	55.3	65.4	60.3	165.3	163.3	164.3	Linear
586	Pakistan	Y	1980s	112	90	105	104.6	93.3	99.1	43.1	47.7	45.4	143.2	136.5	139.9	Linear
586	Pakistan	Y	1990s	113	98	108	91.9	81.3	86.7	33.8	34.6	34.2	122.5	113	117.9	Linear
586	Pakistan	Y	2000s	114	107	112	78.5	68.9	73.8	27.1	25.3	26.2	103.5	92.4	98.1	Linear
591	Panama	Y	1970s	122	103	115	43.8	36	40	21.7	21	21.4	64.5	56.2	60.5	Linear
591	Panama	Y	1980s	121	102	116	33.5	27.6	30.6	10.1	9.9	10	43.3	37.2	40.3	Linear
591	Panama	Y	1990s	121	107	118	27.7	22.9	25.3	7.2	6.7	6.9	34.7	29.4	32.1	Linear
591	Panama	Y	2000s	121	116	120	21.2	17.5	19.4	6.5	5.6	6.1	27.6	23	25.3	Linear
598	Papua New Guinea	N	1970s	112	118	114	98.4	87.7	93.3	51.2	43.4	47.4	144.5	127.3	136.2	Average
598	Papua New Guinea	N	1980s	112	118	114	77.8	69.3	73.7	34.1	28.9	31.5	109.2	96.2	102.9	Average
598	Papua New Guinea	N	1990s	112	118	114	67.7	60.4	64.2	27.1	23	25.1	93	82	87.7	Average
598	Papua New Guinea	N	2000s	112	118	114	56	50	53.1	19.9	16.8	18.4	74.8	65.9	70.5	Average
600	Paraguay	Y	1970s	108	116	110	53.9	50.1	52	21	18.1	19.6	73.8	67.3	70.6	Linear
600	Paraguay	Y	1980s	115	114	115	51.1	44.3	47.8	16.8	14.8	15.8	67	58.4	62.8	Linear
600	Paraguay	Y	1990s	123	109	119	45.1	36.8	41.1	11.5	10.6	11.1	56.1	47	51.7	Linear
600	Paraguay	Y	2000s	130	100	124	38.1	29.3	33.8	6.9	6.9	6.9	44.7	36	40.4	Linear
604	Peru	Y	1970s	117	100	110	112.8	96.7	104.9	56.9	57	57	163.3	148.1	155.9	Linear
604	Peru	Y	1980s	118	101	113	80.9	68.4	74.8	32.7	32.5	32.6	111	98.7	105	Linear
604	Peru	Y	1990s	120	107	115	47	39.2	43.2	26.4	24.6	25.5	72.1	62.8	67.6	Linear
604	Peru	Y	2000s	121	107	117	28.2	23.2	25.8	11.2	10.4	10.9	39.1	33.4	36.3	Linear
608	Philippines	Y	1970s	131	90	117	62.7	47.9	55.5	20.9	23.2	22	82.2	70	76.3	Linear
608	Philippines	Y	1980s	132	98	121	48	36.4	42.4	15.6	15.9	15.7	62.8	51.8	57.5	Linear
608	Philippines	Y	1990s	133	107	125	36.7	27.7	32.3	11.7	10.9	11.3	48	38.2	43.2	Linear
608	Philippines	Y	2000s	134	118	129	28.1	21	24.6	8.7	7.4	8.1	36.6	28.3	32.5	Linear
616	Poland	Y	1970s	130	125	130	28.1	21.5	24.9	3.9	3.1	3.5	31.8	24.6	28.3	Loess
616	Poland	Y	1980s	129	127	129	20.1	15.5	17.9	2.8	2.2	2.5	22.9	17.7	20.4	Loess
616	Poland	Y	1990s	125	127	125	13.4	10.7	12.1	2	1.6	1.8	15.4	12.3	13.9	Loess
616	Poland	Y	2000s	120	125	121	7.1	5.9	6.5	1.2	1	1.1	8.3	6.9	7.6	Loess
620	Portugal	Y	1970s	124	114	122	39.2	31.7	35.6	8.4	7.3	7.9	47.3	38.8	43.2	Loess
620	Portugal	Y	1980s	125	124	125	18.3	14.6	16.5	4.4	3.5	4	22.6	18.1	20.4	Loess
620	Portugal	Y	1990s	122	127	123	8.3	6.8	7.6	2.7	2.1	2.4	11	8.9	10	Loess
620	Portugal	Y	2000s	118	130	120	4.1	3.5	3.8	1.2	1	1.1	5.3	4.4	4.9	Loess
630	Puerto Rico	Y	1970s	133	116	130	25.6	19.3	22.5	3.9	3.4	3.7	29.4	22.6	26.1	Loess
630	Puerto Rico	Y	1980s	127	124	127	17.3	13.6	15.5	2.9	2.3	2.6	20.1	15.9	18.1	Loess
630	Puerto Rico	Y	1990s	122	126	122	12.4	10.1	11.3	2.3	1.8	2.1	14.6	12	13.3	Loess
630	Puerto Rico	Y	2000s	118	131	120	8.5	7.2	7.8	1.8	1.4	1.6	10.3	8.5	9.4	Loess
634	Qatar	Y	1980s	105	127	109	26	24.8	25.4	7.1	5.6	6.4	32.9	30.3	31.6	Linear
634	Qatar	Y	1990s	111	132	113	17	15.4	16.3	3.1	2.4	2.8	20.1	17.8	19	Linear
634	Qatar	Y	2000s	116	125	118	10.7	9.3	10	2.6	2.1	2.4	13.3	11.3	12.4	Linear
410	Republic of Korea	Y	1970s	107	110	108	36.9	34.4	35.7	12.2	11.1	11.7	48.6	45	46.9	Linear
410	Republic of Korea	Y	1980s	108	115	110	20.4	18.9	19.7	6.8	6	6.4	27.1	24.8	26	Linear
410	Republic of Korea	Y	1990s	109	119	111	8.5	7.8	8.2	2.8	2.4	2.6	11.3	10.2	10.8	Linear
410	Republic of Korea	Y	2000s	109	126	113	4.7	4.3	4.5	1.4	1.1	1.3	6.1	5.4	5.8	Linear
642	Romania	Y	1970s	120	114	119	44.9	37.5	41.3	10.4	9.2	9.8	54.9	46.3	50.7	Loess
642	Romania	Y	1980s	124	116	122	33.8	27.2	30.6	9.5	8.2	8.9	43	35.2	39.2	Loess
642	Romania	Y	1990s	125	120	124	29.2	23.3	26.3	6.6	5.5	6.1	35.6	28.6	32.2	Loess
642	Romania	Y	2000s	126	125	126	19.2	15.3	17.3	3.6	2.9	3.3	22.8	18.1	20.5	Loess
643	Russian Federation	Y	1970s	133	121	130	34.2	25.8	30.1	7	5.8	6.4	40.9	31.4	36.3	Loess
643	Russian Federation	Y	1980s	135	127	133	27.6	20.4	24.1	6.7	5.3	6	34.1	25.6	30	Loess
643	Russian Federation	Y	1990s	134	128	132	23.9	17.9	21	5.6	4.4	5	29.4	22.2	25.9	Loess
643	Russian Federation	Y	2000s	131	129	130	14.9	11.4	13.2	3.9	3	3.4	18.7	14.3	16.6	Loess
646	Rwanda	Y	1970s	114	108	111	142	124.5	133.3	106.7	98.5	102.6	233.5	210.7	222.2	Linear
646	Rwanda	Y	1980s	114	108	111	129.8	114.2	122.1	67.3	62.5	64.8	188.3	169.6	179	Linear
646	Rwanda	Y	1990s	113	110	111	130.4	115.2	122.8	97.1	88	92.5	214.8	193	203.9	Linear
646	Rwanda	Y	2000s	113	110	112	110.2	97.8	104	42.1	38.4	40.2	147.6	132.4	140	Linear
686	Senegal	Y	1970s	116	97	104	111.2	95.6	103.5	158	162.8	160.4	251.5	242.7	247.2	Linear
686	Senegal	Y	1980s	117	100	107	90.8	77.4	84.2	97.5	97.4	97.5	179.4	167.3	173.4	Linear
686	Senegal	Y	1990s	118	105	111	74.8	63.2	69.1	76.8	72.9	74.9	145.8	131.5	138.8	Linear
686	Senegal	Y	2000s	119	110	115	62.7	52.5	57.7	52.7	47.9	50.3	112.1	97.9	105.1	Linear
688	Serbia	Y	1980s	106	101	105	35.1	33	34.1	6.8	6.7	6.7	41.6	39.5	40.6	Loess
688	Serbia	Y	1990s	122	111	121	18.1	14.8	16.5	2.7	2.4	2.5	20.7	17.2	19	Loess
688	Serbia	Y	2000s	132	124	131	9.1	6.8	8	1.4	1.2	1.3	10.5	8	9.3	Loess
694	Sierra Leone	Y	1980s	116	115	115	155.1	133.4	144.4	117.3	102.1	109.7	254.1	221.8	238.2	Linear
694	Sierra Leone	Y	1990s	114	115	113	171.5	150.5	161.2	144	125	134.5	290.8	256.7	274	Linear
694	Sierra Leone	Y	2000s	112	114	112	130.2	116.6	123.5	86.3	75.6	81	205.2	183.2	194.3	Linear
702	Singapore	Y	1970s	130	104	124	16.5	12.8	14.7	3.6	3.5	3.6	20.1	16.2	18.2	Loess
702	Singapore	Y	1980s	124	109	121	9.7	7.8	8.8	2.2	2	2.1	11.9	9.8	10.9	Loess
702	Singapore	Y	1990s	123	112	120	4.5	3.7	4.1	1.2	1	1.1	5.7	4.7	5.2	Loess
702	Singapore	Y	2000s	129	111	124	2.6	2	2.3	0.7	0.7	0.7	3.3	2.7	3	Loess
703	Slovakia	Y	1980s	132	121	130	21.4	16.3	18.9	3.2	2.7	3	24.6	18.9	21.8	Loess
703	Slovakia	Y	1990s	129	122	128	13.6	10.5	12.1	2.5	2.1	2.3	16.1	12.6	14.4	Loess
703	Slovakia	Y	2000s	126	123	125	9	7.2	8.1	2	1.6	1.8	11	8.8	9.9	Loess
705	Slovenia	Y	1980s	127	122	126	13.6	10.7	12.2	2.3	1.9	2.1	15.9	12.6	14.3	Loess
705	Slovenia	Y	1990s	132	140	133	6.8	5.2	6	1.5	1.1	1.3	8.3	6.2	7.3	Loess
705	Slovenia	Y	2000s	111	141	116	3.6	3.2	3.4	0.9	0.7	0.8	4.5	3.9	4.2	Loess
706	Somalia	Y	1980s	119	117	117	143.8	120.7	132.5	109.9	94.1	102	237.9	203.4	220.9	Linear
706	Somalia	Y	1990s	113	109	111	140.1	123.6	131.9	105.6	97	101.3	230.8	208.5	219.8	Linear
706	Somalia	Y	2000s	108	100	104	112.5	104.6	108.6	77.8	77.5	77.6	181.5	174	177.8	Linear
710	South Africa	Y	1970s	126	111	121	82.1	65.4	73.9	33.4	30	31.7	112.7	93.4	103.2	Linear
710	South Africa	Y	1980s	122	110	119	62.2	50.9	56.7	21	19	20	81.9	69	75.5	Linear
710	South Africa	Y	1990s	119	112	117	57.7	48.6	53.2	19.4	17.4	18.4	76	65.1	70.7	Linear
710	South Africa	Y	2000s	115	114	115	61	52.9	57	27.9	24.4	26.2	87.2	76	81.7	Linear
724	Spain	Y	1970s	126	123	126	21.4	16.9	19.2	4.3	3.5	3.9	25.5	20.3	23	Loess
724	Spain	Y	1980s	125	124	125	12.3	9.8	11.1	2.7	2.2	2.4	14.9	12	13.5	Loess
724	Spain	Y	1990s	123	121	122	7.2	5.9	6.6	1.9	1.5	1.7	9.1	7.4	8.3	Loess
724	Spain	Y	2000s	121	117	120	5	4.2	4.6	1.2	1	1.1	6.2	5.2	5.7	Loess
144	Sri Lanka	Y	1970s	122	91	111	51.7	42.4	47.1	20.6	22.7	21.6	71.1	64.1	67.7	Linear
144	Sri Lanka	Y	1980s	123	92	115	29.9	24.4	27.2	7.6	8.3	7.9	37.3	32.5	34.9	Linear
144	Sri Lanka	Y	1990s	123	101	119	22.6	18.3	20.5	4.6	4.6	4.6	27.1	22.9	25	Linear
144	Sri Lanka	Y	2000s	124	116	122	15.7	12.7	14.2	2.7	2.3	2.5	18.3	15	16.7	Linear
736	Sudan	Y	1970s	118	100	109	130.7	110.8	121	93.9	94.1	94	212.4	194.4	203.6	Linear
736	Sudan	Y	1980s	117	100	110	110.8	94.4	102.8	73.5	73.2	73.3	176.2	160.6	168.6	Linear
736	Sudan	Y	1990s	117	102	110	92.6	79.2	86.1	60.1	59.1	59.6	147.2	133.7	140.6	Linear
736	Sudan	Y	2000s	116	102	111	71.9	61.8	67	40.2	39.5	39.9	109.2	98.8	104.1	Linear
748	Swaziland	N	1970s	135	102	122	132.7	98.6	115.9	61.3	60	60.7	185.8	152.7	169.5	Average
748	Swaziland	N	1980s	135	98	122	96	71.4	83.9	37.2	37.9	37.5	129.6	106.5	118.2	Average
748	Swaziland	N	1990s	135	97	122	85.6	63.6	74.7	31.5	32.5	32	114.3	94	104.3	Average
748	Swaziland	N	2000s	135	102	122	93	69.1	81.3	43.1	42.4	42.8	132.1	108.6	120.5	Average
752	Sweden	Y	1970s	129	126	128	9.9	7.7	8.8	1.8	1.4	1.6	11.7	9.1	10.4	Loess
752	Sweden	Y	1980s	127	123	126	7.1	5.6	6.4	1.3	1.1	1.2	8.4	6.7	7.6	Loess
752	Sweden	Y	1990s	123	122	123	4.5	3.7	4.1	0.9	0.7	0.8	5.4	4.4	4.9	Loess
752	Sweden	Y	2000s	118	121	118	3	2.6	2.8	0.9	0.7	0.8	3.9	3.3	3.6	Loess
756	Switzerland	Y	1970s	132	131	131	12.6	9.5	11.1	3.1	2.4	2.7	15.6	11.9	13.8	Loess
756	Switzerland	Y	1980s	130	131	130	8.1	6.2	7.2	2	1.6	1.8	10.1	7.8	9	Loess
756	Switzerland	Y	1990s	126	130	127	5.8	4.6	5.2	1.4	1	1.2	7.1	5.6	6.4	Loess
756	Switzerland	Y	2000s	123	129	124	4.7	3.8	4.3	0.9	0.7	0.8	5.6	4.5	5.1	Loess
760	Syrian Arab Republic	N	1970s	119	106	115	76.1	64.1	70.2	28.9	27.3	28.1	102.8	89.6	96.4	Average
760	Syrian Arab Republic	N	1980s	119	101	115	46.6	39.3	43	12.3	12.1	12.2	58.3	50.8	54.7	Average
760	Syrian Arab Republic	N	1990s	119	95	115	25.4	21.4	23.4	4.3	4.5	4.4	29.6	25.8	27.7	Average
760	Syrian Arab Republic	N	2000s	119	91	115	17.6	14.8	16.2	2.3	2.5	2.4	19.9	17.3	18.6	Average
762	Tajikistan	Y	1980s	122	91	113	112.5	91.9	102.4	35	38.7	36.8	143.6	127	135.5	Linear
762	Tajikistan	Y	1990s	127	95	118	93.5	73.9	83.9	26.8	28.1	27.4	117.7	99.9	109	Linear
762	Tajikistan	Y	2000s	131	102	123	67.2	51.5	59.5	19.2	18.9	19	85.1	69.4	77.4	Linear
764	Thailand	Y	1970s	124	109	120	62.8	50.5	56.8	20.9	19.2	20.1	82.3	68.7	75.7	Linear
764	Thailand	Y	1980s	125	113	123	37.7	30.1	34	8.5	7.5	8	45.9	37.4	41.8	Linear
764	Thailand	Y	1990s	126	123	126	22.9	18.2	20.6	3.9	3.2	3.6	26.7	21.3	24.1	Linear
764	Thailand	Y	2000s	127	140	128	15.4	12.1	13.8	2.3	1.7	2	17.6	13.7	15.7	Linear
807	The former Yugoslav Republic of Macedonia	Y	1980s	107	101	106	46.2	43.3	44.8	8.4	8.3	8.4	54.2	51.3	52.8	Loess
807	The former Yugoslav Republic of Macedonia	Y	1990s	113	114	113	22.9	20.2	21.6	2.9	2.6	2.8	25.7	22.8	24.3	Loess
807	The former Yugoslav Republic of Macedonia	Y	2000s	119	128	119	12.9	10.9	11.9	1.6	1.2	1.4	14.4	12.1	13.3	Loess
626	Timor-Leste	Y	1980s	115	110	112	183.6	160.4	172.3	108.7	98.6	103.7	272.3	243	258	Average
626	Timor-Leste	Y	1990s	116	103	111	122.8	106.3	114.8	61.4	59.6	60.5	176.6	159.4	168.2	Average
626	Timor-Leste	Y	2000s	116	94	109	78.3	67.2	72.9	30	31.7	30.8	105.9	96.7	101.4	Average
768	Togo	N	1970s	125	108	116	131.7	104.9	118.4	93.3	86.8	90	212.7	182.6	197.7	Average
768	Togo	N	1980s	125	106	116	112.3	89.5	101	73	68.6	70.8	177	152	164.6	Average
768	Togo	N	1990s	125	105	116	96.9	77.2	87.1	58.4	55.5	57	149.6	128.5	139.1	Average
768	Togo	N	2000s	125	104	116	83.8	66.7	75.3	47.7	45.7	46.7	127.4	109.4	118.5	Average
780	Trinidad and Tobago	Y	1970s	121	113	119	41.6	34.3	38	14.8	13	13.9	55.8	46.9	51.4	Linear
780	Trinidad and Tobago	Y	1980s	122	112	120	33.2	27.2	30.2	8.5	7.6	8	41.4	34.6	38	Linear
780	Trinidad and Tobago	Y	1990s	123	111	121	31.4	25.5	28.5	7.1	6.4	6.7	38.2	31.7	35	Linear
780	Trinidad and Tobago	Y	2000s	124	113	121	30.7	24.7	27.7	7.9	7	7.5	38.3	31.6	35	Linear
788	Tunisia	Y	1970s	108	84	102	106.9	99.5	103.3	27.7	33.1	30.3	131.6	129.3	130.5	Linear
788	Tunisia	Y	1980s	117	96	113	60.7	52	56.5	13.3	14	13.6	73.2	65.2	69.3	Linear
788	Tunisia	Y	1990s	126	108	123	34.1	27.1	30.7	6.6	6.1	6.3	40.5	33	36.8	Linear
788	Tunisia	Y	2000s	136	125	134	25.4	18.7	22.1	5.9	4.7	5.3	31.1	23.3	27.3	Linear
792	Turkey	Y	1970s	118	97	112	141	119.2	130.4	51.1	52.7	51.9	184.8	165.5	175.4	Linear
792	Turkey	Y	1980s	115	97	111	93.5	80.9	87.4	28.5	29.4	29	119.3	107.9	113.7	Linear
792	Turkey	Y	1990s	113	96	110	57.4	50.9	54.2	12.4	12.9	12.6	69.1	63.1	66.2	Linear
792	Turkey	Y	2000s	110	99	108	29	26.3	27.7	4.4	4.5	4.4	33.3	30.7	32	Linear
795	Turkmenistan	Y	1980s	121	107	118	93.9	77.6	85.9	27.2	25.3	26.3	118.5	100.9	109.9	Linear
795	Turkmenistan	Y	1990s	127	108	122	76.2	60.1	68.4	20.4	19	19.7	95.1	77.9	86.7	Linear
795	Turkmenistan	Y	2000s	133	109	127	58.1	43.8	51.1	15.4	14.1	14.7	72.6	57.3	65.1	Linear
800	Uganda	Y	1970s	108	112	109	108.5	100.1	104.4	78.9	70.3	74.6	178.8	163.4	171.2	Linear
800	Uganda	Y	1980s	114	115	113	114.8	101.1	108	82.9	72.4	77.7	188.2	166.1	177.3	Linear
800	Uganda	Y	1990s	119	117	117	116.7	98.1	107.5	84.1	71.9	78.1	191	163	177.2	Linear
800	Uganda	Y	2000s	124	118	121	94.2	75.7	85.1	61.5	52.1	56.8	149.9	123.8	137	Linear
804	Ukraine	Y	1970s	135	115	131	27.2	20.2	23.8	5	4.4	4.7	32.1	24.5	28.4	Loess
804	Ukraine	Y	1980s	136	119	133	21.9	16.1	19.1	3.7	3.1	3.4	25.5	19.1	22.4	Loess
804	Ukraine	Y	1990s	135	120	133	19.2	14.2	16.8	3.1	2.6	2.8	22.3	16.7	19.6	Loess
804	Ukraine	Y	2000s	134	112	131	15.1	11.2	13.2	2.4	2.1	2.2	17.4	13.3	15.4	Loess
784	United Arab Emirates	N	1970s	137	80	123	50.2	36.7	43.6	10.6	12.8	11.7	60.2	49	54.7	Average
784	United Arab Emirates	N	1980s	137	83	123	23.7	17.3	20.6	5	6	5.5	28.5	23.2	26	Average
784	United Arab Emirates	N	1990s	137	94	123	12.4	9.1	10.8	4.1	4.4	4.2	16.4	13.4	14.9	Average
784	United Arab Emirates	N	2000s	137	77	123	8.7	6.3	7.5	1.6	2	1.8	10.2	8.3	9.3	Average
826	United Kingdom	Y	1970s	129	122	128	17.3	13.4	15.4	2.8	2.3	2.5	20	15.7	17.9	Loess
826	United Kingdom	Y	1980s	128	123	128	10.9	8.5	9.7	1.9	1.5	1.7	12.7	10	11.4	Loess
826	United Kingdom	Y	1990s	126	121	125	6.9	5.5	6.2	1.2	1	1.1	8.1	6.5	7.3	Loess
826	United Kingdom	Y	2000s	124	117	123	5.6	4.5	5.1	1	0.8	0.9	6.6	5.4	6	Loess
834	United Republic of Tanzania	Y	1970s	111	108	109	118.9	107.6	113.3	87.5	81.2	84.4	196	180	188.1	Linear
834	United Republic of Tanzania	Y	1980s	111	106	108	107.4	96.9	102.2	73.4	69.4	71.4	172.9	159.6	166.4	Linear
834	United Republic of Tanzania	Y	1990s	111	104	108	99.9	90	95	66.2	63.8	65.1	159.5	148.1	153.9	Linear
834	United Republic of Tanzania	Y	2000s	111	101	107	74.6	67.1	70.9	44.8	44.2	44.5	116.1	108.3	112.3	Linear
840	United States of America	Y	1970s	127	124	127	17.7	14	15.9	3.3	2.6	2.9	20.9	16.5	18.8	Loess
840	United States of America	Y	1980s	125	125	125	11.7	9.4	10.6	2.4	1.9	2.1	14.1	11.3	12.7	Loess
840	United States of America	Y	1990s	123	124	123	8.7	7.1	7.9	1.8	1.4	1.6	10.5	8.5	9.5	Loess
840	United States of America	Y	2000s	122	123	122	7.4	6.1	6.8	1.3	1.1	1.2	8.8	7.2	8	Loess
858	Uruguay	Y	1970s	126	110	124	49.4	39.1	44.4	6.1	5.5	5.8	55.2	44.4	49.9	Loess
858	Uruguay	Y	1980s	127	111	125	31.2	24.7	28	3.8	3.5	3.6	34.9	28	31.6	Loess
858	Uruguay	Y	1990s	127	122	126	19.9	15.7	17.8	3.6	3	3.3	23.4	18.6	21	Loess
858	Uruguay	Y	2000s	127	131	128	15.3	12	13.7	3.6	2.8	3.2	18.9	14.7	16.9	Loess
860	Uzbekistan	Y	1970s	134	100	127	92.6	69	81.1	18.2	18.2	18.2	109.1	85.9	97.8	Linear
860	Uzbekistan	Y	1980s	136	104	129	78.2	57.7	68.2	15.4	14.7	15.1	92.4	71.6	82.3	Linear
860	Uzbekistan	Y	1990s	137	109	131	65.7	48	57	12.8	11.8	12.3	77.6	59.2	68.6	Linear
860	Uzbekistan	Y	2000s	138	113	133	56.8	41.2	49.1	11.2	9.9	10.5	67.3	50.6	59.1	Linear
862	Venezuela (Bolivarian Republic of)	Y	1970s	123	99	116	48.4	39.4	44	15.6	15.8	15.7	63.2	54.6	59	Linear
862	Venezuela (Bolivarian Republic of)	Y	1980s	126	103	120	33.6	26.8	30.2	7.9	7.7	7.8	41.2	34.3	37.8	Linear
862	Venezuela (Bolivarian Republic of)	Y	1990s	128	114	125	24.6	19.1	21.9	6.5	5.7	6.1	30.9	24.7	27.9	Linear
862	Venezuela (Bolivarian Republic of)	Y	2000s	131	125	130	20.3	15.5	17.9	5.7	4.6	5.2	25.9	20	23	Linear
704	Viet Nam	N	1970s	134	128	130	123.3	92	108	86.4	67.2	76.8	198.8	152.9	176.4	Average
704	Viet Nam	N	1980s	134	125	130	71.3	53.2	62.4	38.3	30.6	34.5	106.8	82.1	94.8	Average
704	Viet Nam	N	1990s	134	120	130	38.3	28.6	33.6	12.8	10.6	11.7	50.6	38.9	44.9	Average
704	Viet Nam	N	2000s	134	116	130	24.9	18.6	21.8	5.8	5	5.4	30.5	23.5	27.1	Average
887	Yemen	Y	1970s	115	94	107	169.4	147.6	158.8	91.2	96.8	93.9	245	229.9	237.6	Linear
887	Yemen	Y	1980s	116	92	108	111.4	95.8	103.8	49.7	54.2	51.9	155.5	144.7	150.2	Linear
887	Yemen	Y	1990s	118	90	108	89	75.5	82.4	35.1	39	37	121	111.5	116.4	Linear
887	Yemen	Y	2000s	120	86	109	64.1	53.7	59	20.2	23.5	21.8	83.1	75.9	79.6	Linear
894	Zambia	Y	1970s	112	92	103	109.2	97.8	103.6	70.8	76.7	73.7	172.2	167	169.6	Linear
894	Zambia	Y	1980s	114	99	107	107	94.3	100.7	69.3	69.8	69.5	168.9	157.5	163.3	Linear
894	Zambia	Y	1990s	115	107	111	113.8	98.6	106.3	79.3	74.2	76.7	184.1	165.5	174.9	Linear
894	Zambia	Y	2000s	117	114	115	106.6	90.8	98.8	74.9	65.8	70.4	173.5	150.6	162.2	Linear
716	Zimbabwe	Y	1970s	136	89	115	90.3	66.3	78.4	46.6	52.6	49.6	132.7	115.4	124.1	Linear
716	Zimbabwe	Y	1980s	126	96	114	67	53	60.1	32.3	33.6	32.9	97	84.8	91	Linear
716	Zimbabwe	Y	1990s	116	111	114	64.3	55.7	60	35.7	32	33.8	97.7	85.8	91.8	Linear
716	Zimbabwe	Y	2000s	105	129	113	65.4	62.3	63.9	46.5	36.1	41.4	108.9	96.1	102.6	Linear

## Sheet: Notes to Table S2
Explanatory notes to Table S2
Table S2 presents the results of an analysis of trends in the sex ratios of mortality rates for children under 5. The main results are the ratios for infant, child and under-five mortality included in Columns E, F, and G in the Table S2 worksheet. Results are presented as an average for each decade (1970s, 1980s, 1990s, 2000s). These ratios are used to disaggregate estimates of infant and under-f…
Main Indicators
Indicator	Notation	Definition
Infant mortality rate	1q0	Probability of death between birth and age 1 (expressed as deaths per 1000 live births)
Child mortality rate	4q1	Probability of death between ages 1 and 4, conditional on survival to age 1 (expressed per 1000)
Under-five mortality rate	5q0	Probability of death between birth and age 5 (expressed as deaths per 1000 live births)
Sex ratio of mortality		The ratio of male mortality to female mortality, expressed per 100
Content of table columns
Column	Label	Description
Column A	ISO Code
Column B	Country	Name of country or area
Column C	Trend estimates of sex ratios	Indicates whether the sex ratios in the database can be interpreted as trends. When the value of this field is N, the ratios for each decade for infant and under-five mortality shall be interpreted as an average for the four-decade period. The ratio of child mortality is a derived measure that may change as the relative levels of infant and under-five mortality change over time.
Column D	Decade	All results are presented as 10-year averages centered at the midpoint of the decade.
Column E	Sex ratio of mortality - infant	The ratio of male-to-female infant mortality for the given decade. This figure is derived from fitting a weighted trend or average to ratios from empirical data.
Column F	Sex ratio of mortality - child	The ratio of male-to-female under-five mortality for the given decade. This figure is derived after applications of the ratios of infant and under-five mortality to estimates of infant and under-five mortality for both-sexes combined.
Column G	Sex ratio of mortality - under-five	The ratio of male-to-female under-five mortality for the given decade. This figure is derived from fitting a weighted trend or average to ratios from empirical data.
Column H	Infant mortality rate (1q0) - male	The male infant mortality derived from applying the sex ratio in Column E to the both sexes estimate in Column J
Column I	Infant mortality rate (1q0) - female	The female infant mortality derived from applying the sex ratio in Column E to the both sexes estimate in Column J
Column J	Infant mortality rate (1q0) - both sexes	For countries in the less developed regions (see Table S3), this is the average of the two quinquennial periods comprised by this decade from World Population Prospects: The 2010 Revision. For countries in the more developed regions, this is the mid-decade estimate from State of the World's Children 2012.
Column K	Child mortality rate (4q1) - male	The male child mortality derived from the male infant and under-five mortality levels in Columns H and N, respectively.
Column L	Child mortality rate (4q1) - female	The female child mortality derived from the female infant and under-five mortality levels in Columns I and O, respectively.
Column M	Child mortality rate (4q1) - both sexes	The both-sexes child mortality derived from the male infant and under-five mortality levels in Columns H and N, respectively.
Column N	Under-five mortality rate (5q0) - male	The male under-five mortality derived from applying the sex ratio in Column E to the both sexes estimate in Column P
Column O	Under-five mortality rate (5q0) - female	The female under-five mortality derived from applying the sex ratio in Column E to the both sexes estimate in Column P
Column P	Under-five mortality rate (5q0) - both sexes	For countries in the less developed regions (see Table S3), this is the average of the two quinquennial periods comprised by this decade from World Population Prospects: The 2010 Revision. For countries in the more developed regions, this is the mid-decade estimate from State of the World's Children 2012.
Column Q	Method used to derive sex ratio estimates	Indicates whether the sex ratio trend was fitted using locally weighted regression (Loess), robust linear regression (Linear), or average (Average)
